# Supplementary material
Source: Springer Nature journal article supplement (https://www.springermedizin.de/resource/supplementary/12913_2013_3760_MOESM2_ESM.pdf/9532488)

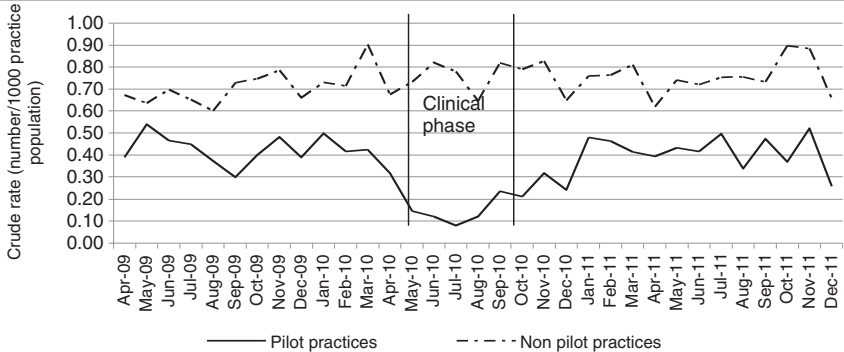

NB: Non pilot GP practices are the total in county minus the pilot practices

Supplement: MOESM2 [file 9532488]
